# Supplementary material for: Dinuclear Iron Complexes of Iminopyridine-Based Ligands as Selective Cytotoxins for Tumor Cells and Inhibitors of Cancer Cell Migration
Source: MDPI journal article supplement (doi:10.3390/pharmaceutics14122801), 2022-12-14
Supplement: s1 [file s1]

# Supplementary Materials: Dinuclear Iron Complexes of Iminopyridine-Based Ligands as Selective Cytotoxins for Tumor Cells and Inhibitors of Cancer Cell Migration

Jessica Castro, Marlon Bravo, Meritxell Albertí, Anaís Marsal, María José Alonso-De Gennaro, Oriol Martínez-Ferraté, Carmen Claver, Piet W. N. M. van Leeuwen, Isabel Romero, Antoni Benito and Maria Vilanova

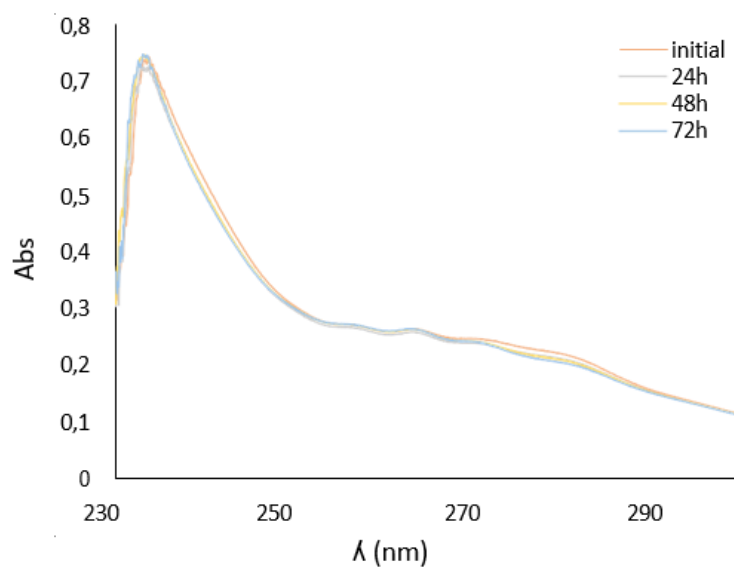

(A)

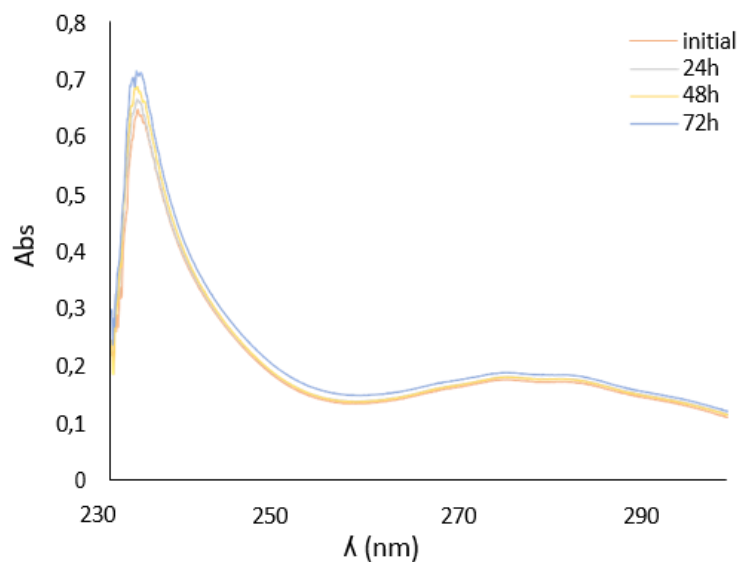

(B)

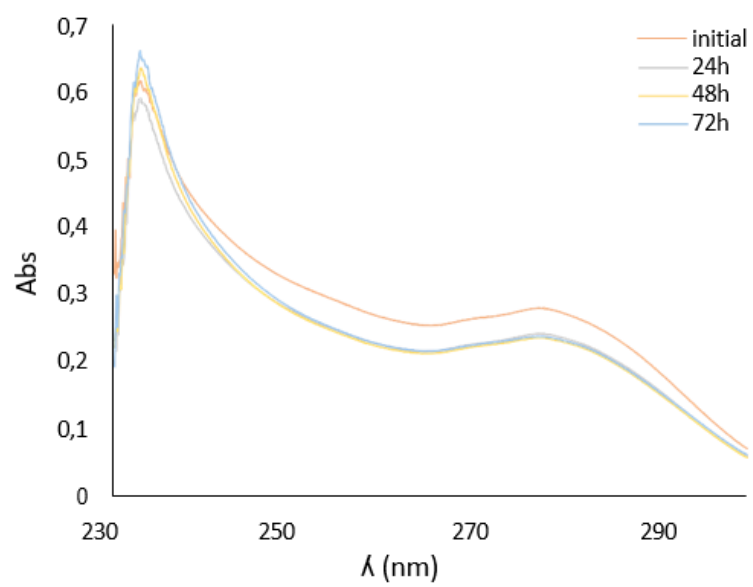

(C)

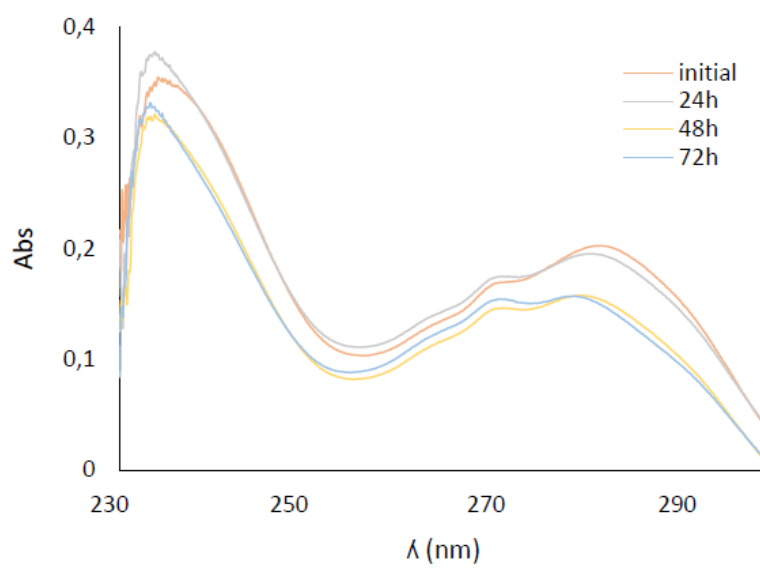

(D)

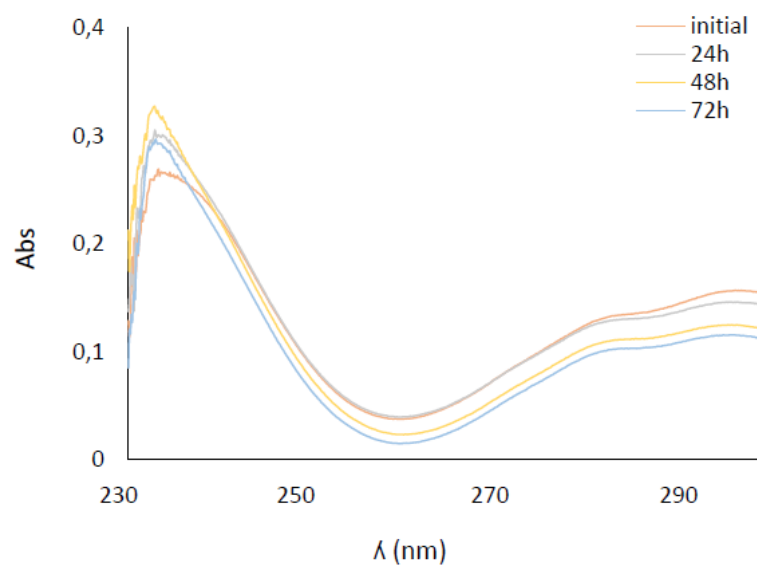

(E)

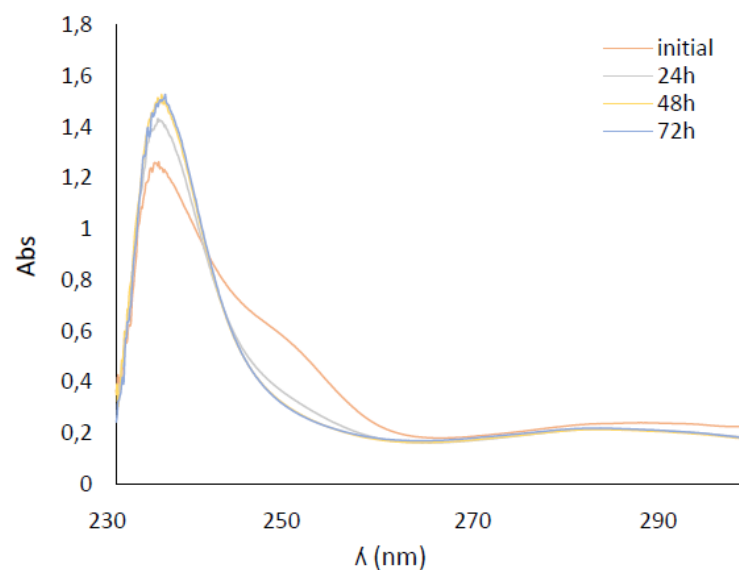

(F)

**Figure S1.** Stability of complexes. The stability of compounds 7 (A), 8 (B), 9 (C), 10 (D), 11 (E) and 12 (F) has been studied in physiological conditions for up to 72 h. UV-spectra registered along the time for all the assayed compounds are displayed.
